# Supplementary material for: Inherently chiral helicene-substituted thioalkyl porphyrazine complexes: synthesis and electronic and chiroptical properties
Source: Royal Society of Chemistry journal article supplement (doi:10.1039/d2dt02665a), 2022-01-01
Supplement: d2dt02665a1.pdf [file d2dt02665a1.pdf]

## Electronic Supplementary Information

# Inherently Chiral Helicene-Substituted Thioalkyl Porphyrazine Complexes: Synthesis, Electronic, and Chiroptical Properties

Sandra Belviso\*<sup>a</sup>, Giulia Marsico<sup>a</sup>, Roberta Franzini<sup>b</sup>, Claudio Villani<sup>b</sup>, Sergio Abbate<sup>c,d</sup>,  
Giovanna Longhi\*<sup>c,d</sup>

<sup>a</sup>Dipartimento di Scienze, Università della Basilicata, Viale dell'Ateneo Lucano 10, 85100 Potenza,  
Italy

<sup>b</sup>Dipartimento di Medicina Molecolare e Traslazionale, Università di Brescia, Viale Europa 11,  
25123 Brescia, Italy

<sup>c</sup>Dipartimento di Chimica e Tecnologie del Farmaco, Università di Roma "La Sapienza", Piazzale  
Aldo Moro 5, 00185 Roma, Italy

<sup>d</sup>I.N.O.-CNR Unit of Brescia, c/o CSMT via Branze, 45 – 25123 Brescia, Italy

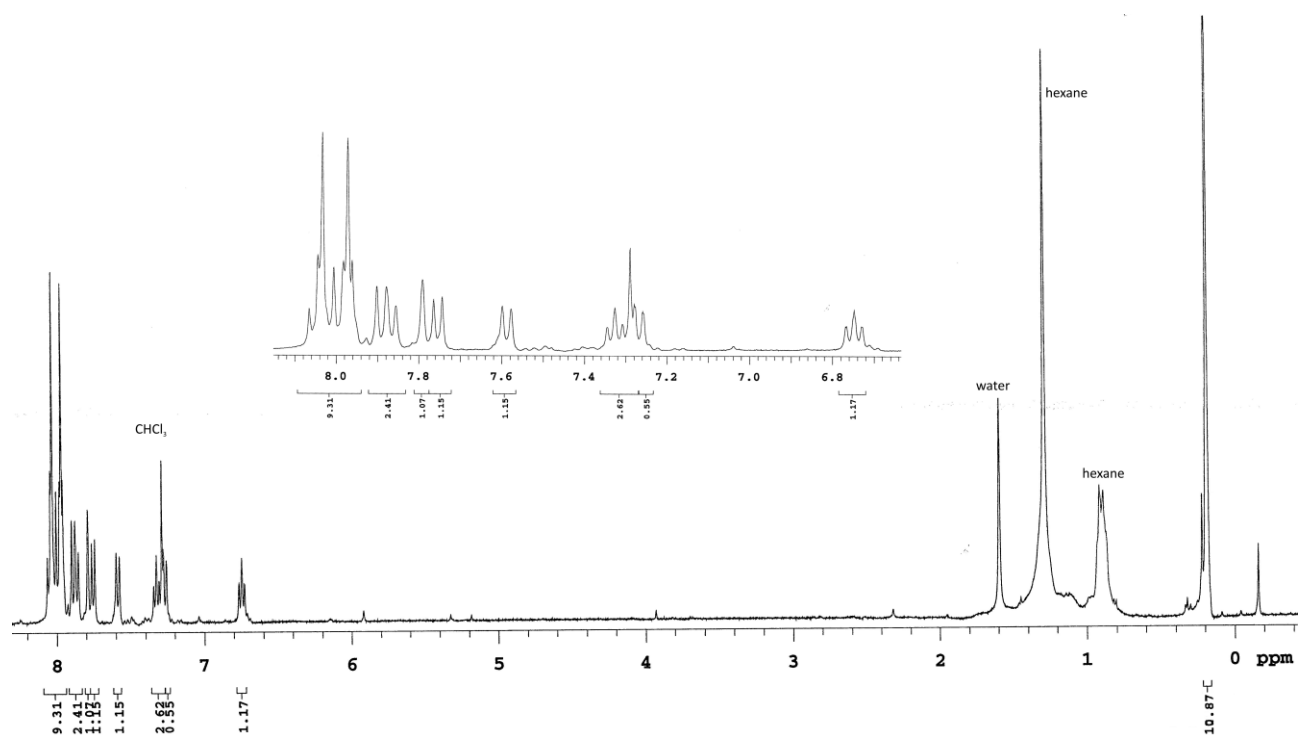

**Figure S1.**  $^1\text{H}$ NMR spectrum of compound **2** in  $\text{CDCl}_3$ .

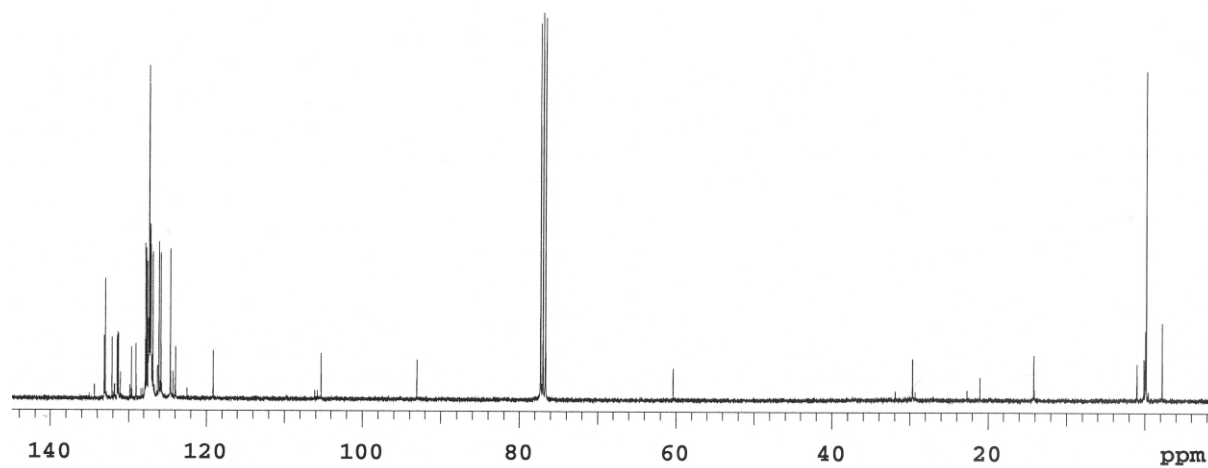

**Figure S2.**  $^{13}\text{C}$ NMR spectrum of compound **2** in  $\text{CDCl}_3$ .

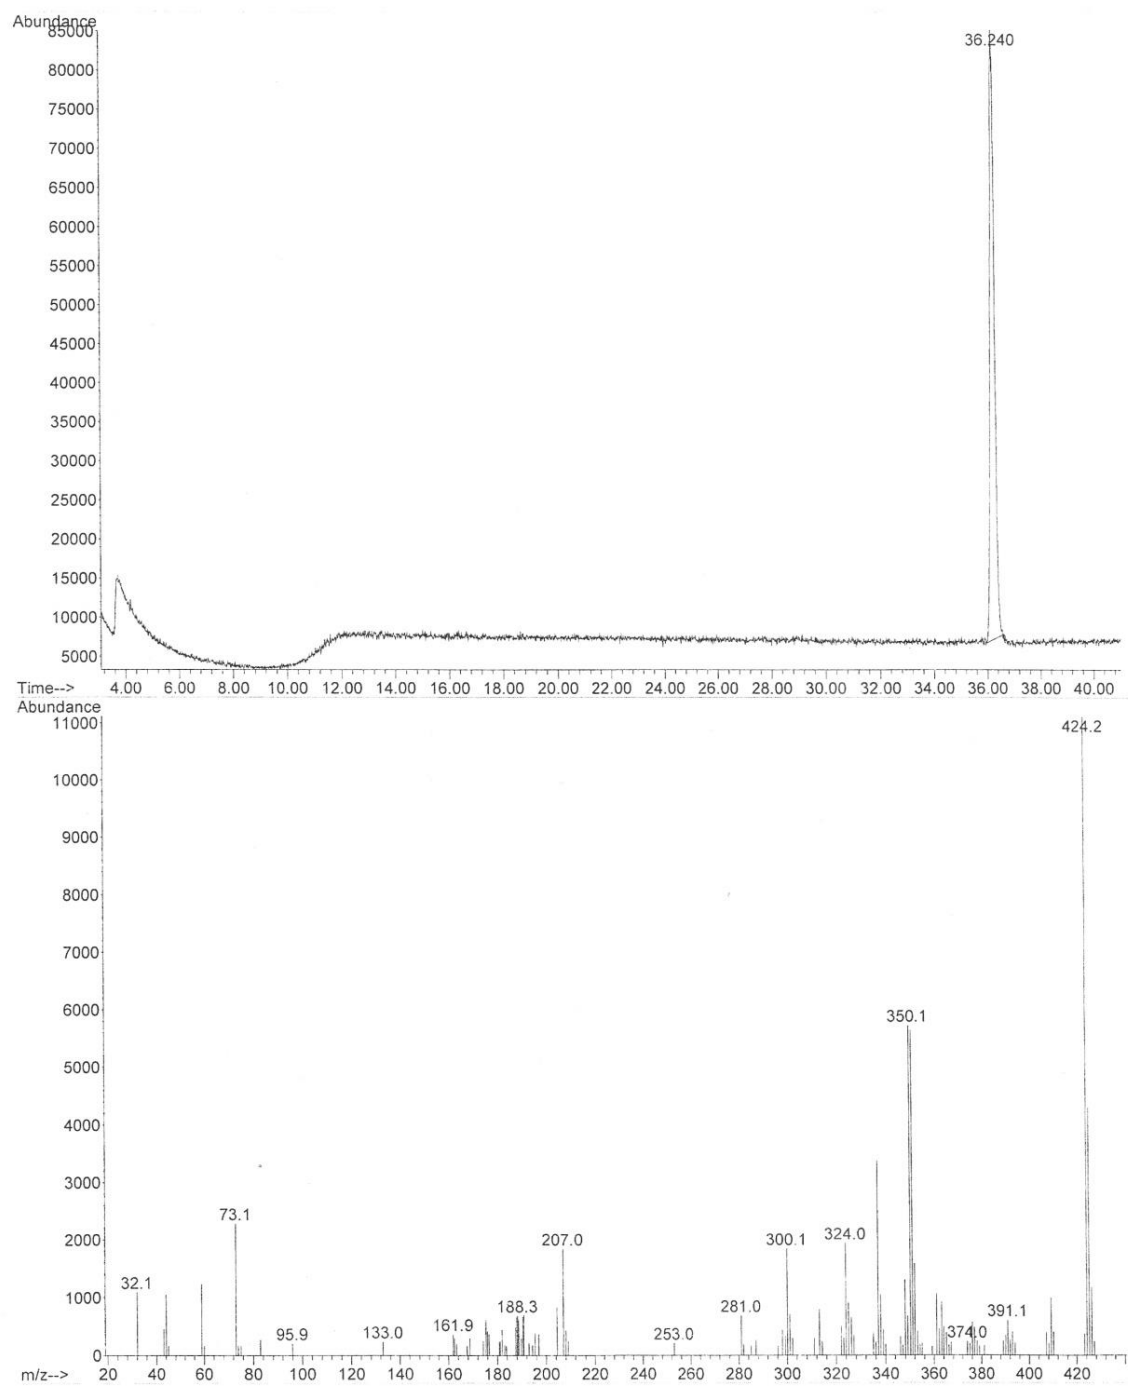

**Figure S3.** GC-MS spectrum of compound **2** in  $\text{CDCl}_3$ .

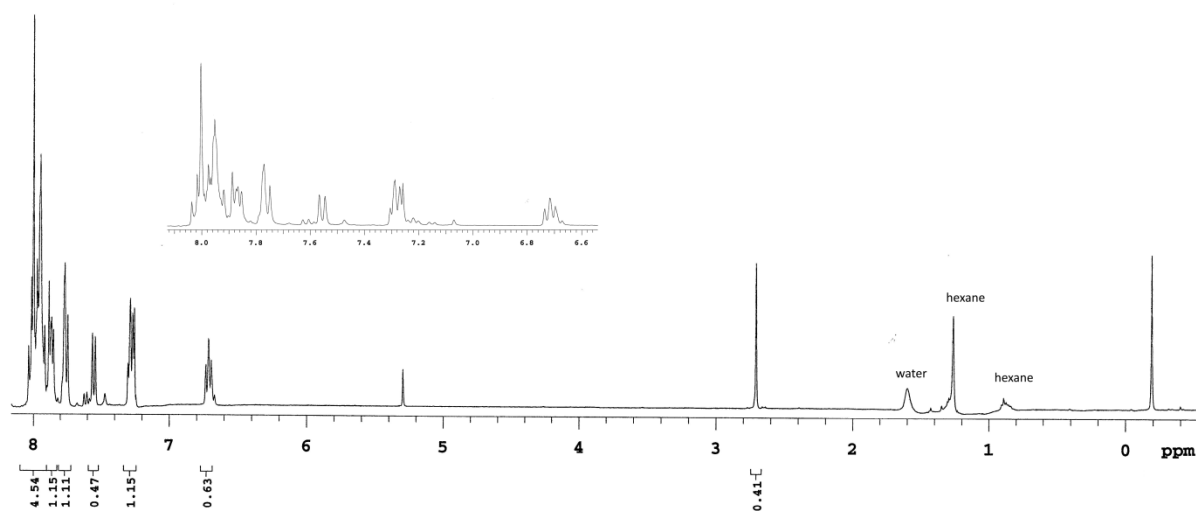

**Figure S4.**  $^1\text{H}$ NMR spectrum of compound **3** in  $\text{CDCl}_3$ .

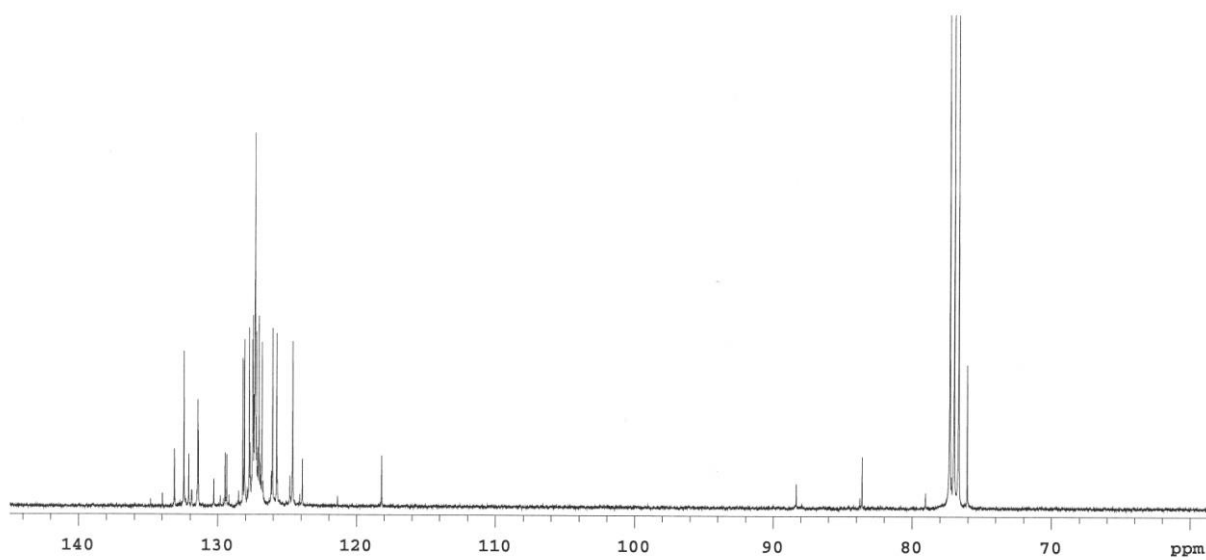

**Figure S5.**  $^{13}\text{C}$ NMR spectrum of compound **3** in  $\text{CDCl}_3$ .

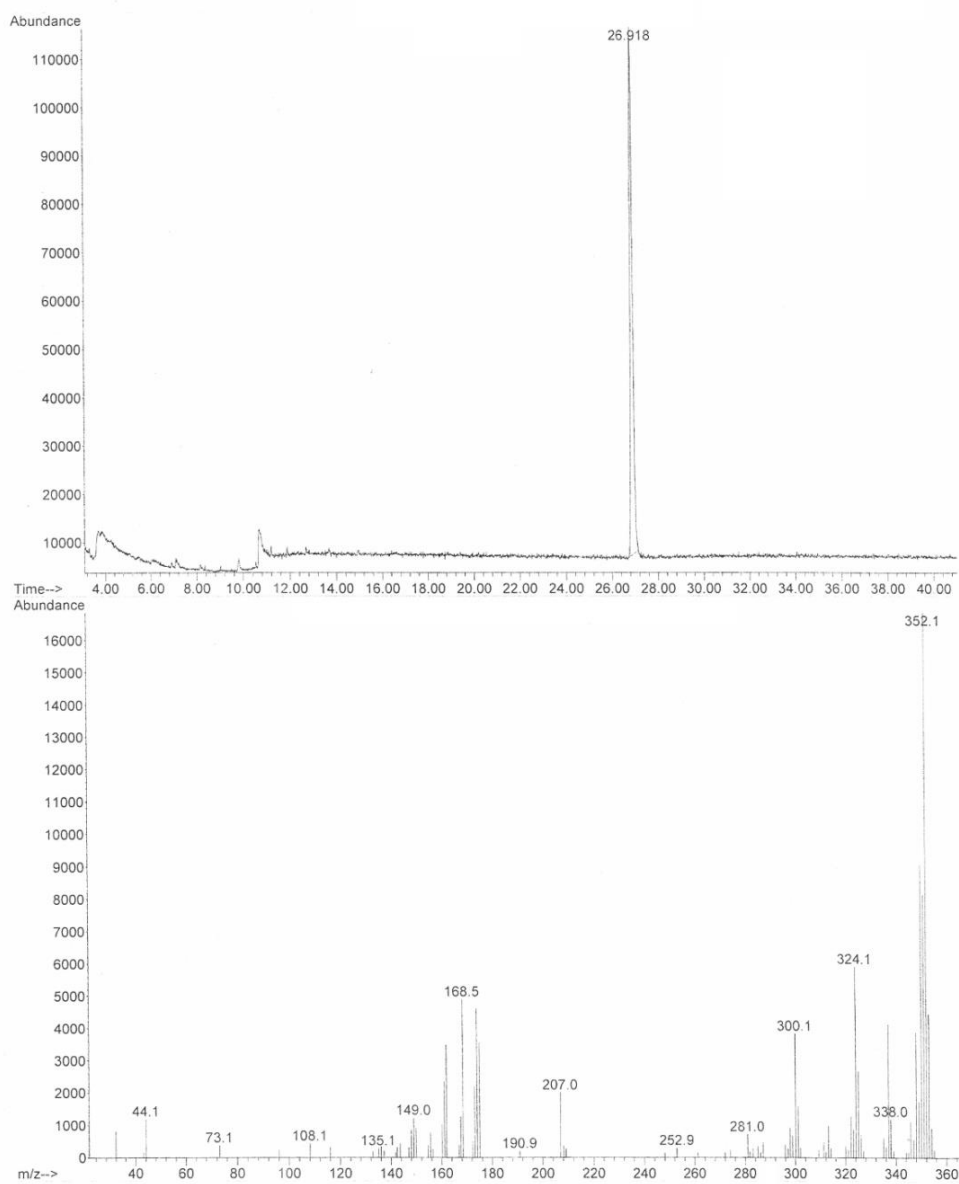

**Figure S6.** GC-MS spectrum of compound **3** in  $\text{CDCl}_3$ .

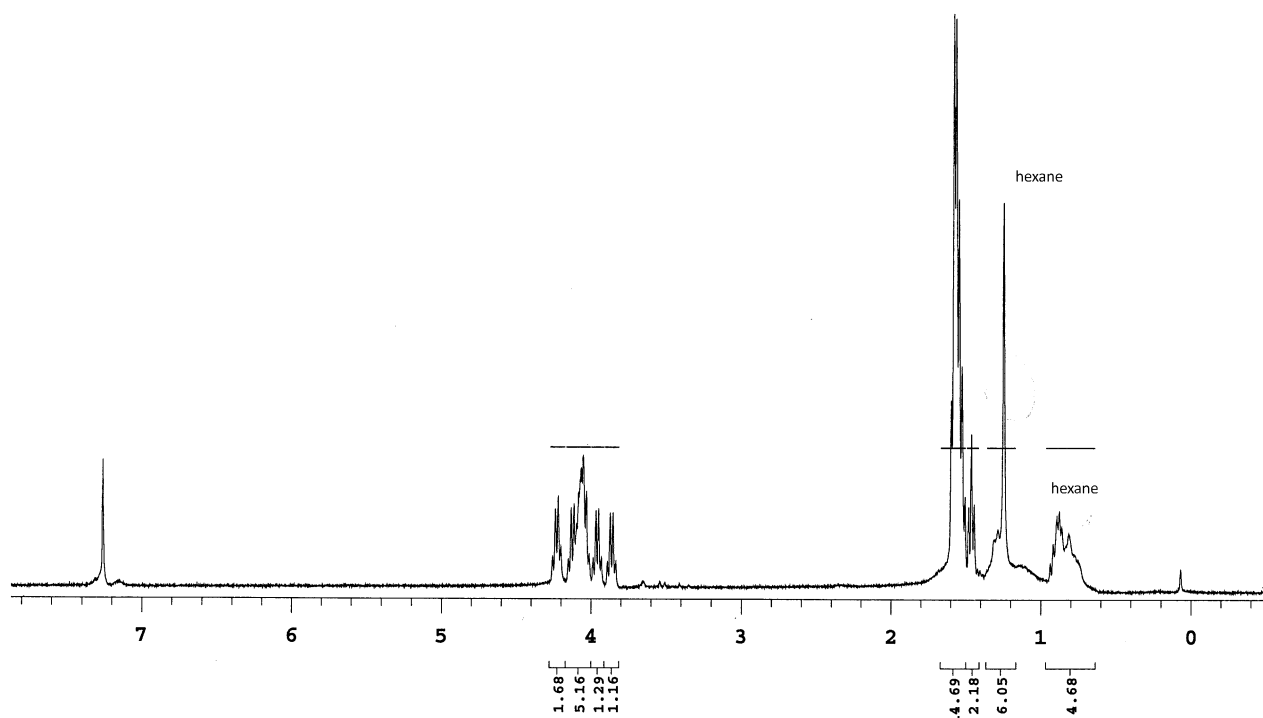

**Figure S7.** <sup>1</sup>H NMR spectrum of compound **6c** in CDCl<sub>3</sub>.

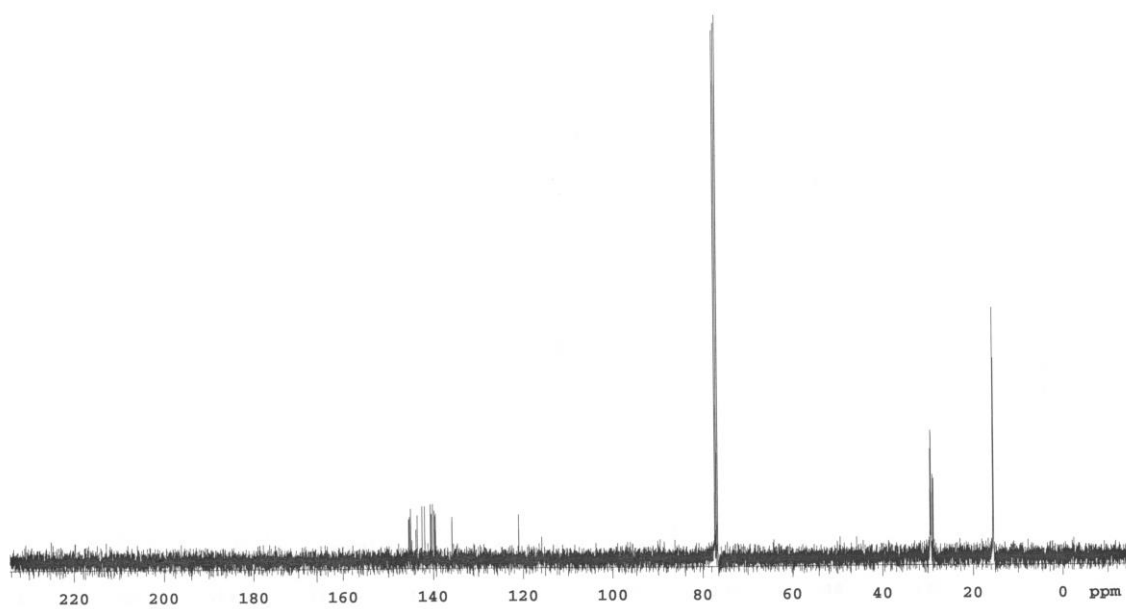

**Figure S8.** <sup>13</sup>C NMR spectrum of compound **6c** in CDCl<sub>3</sub>.

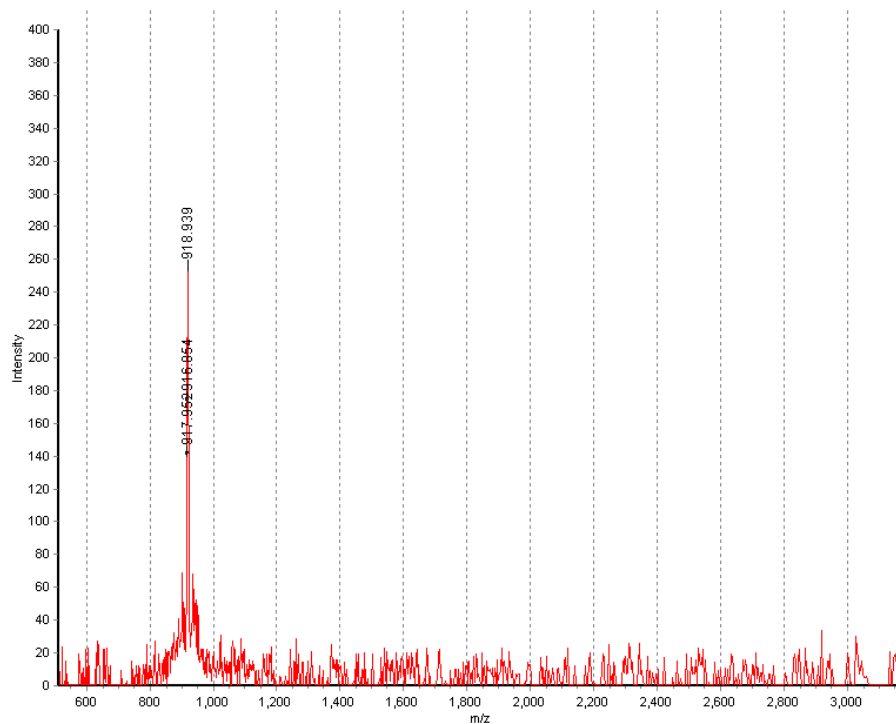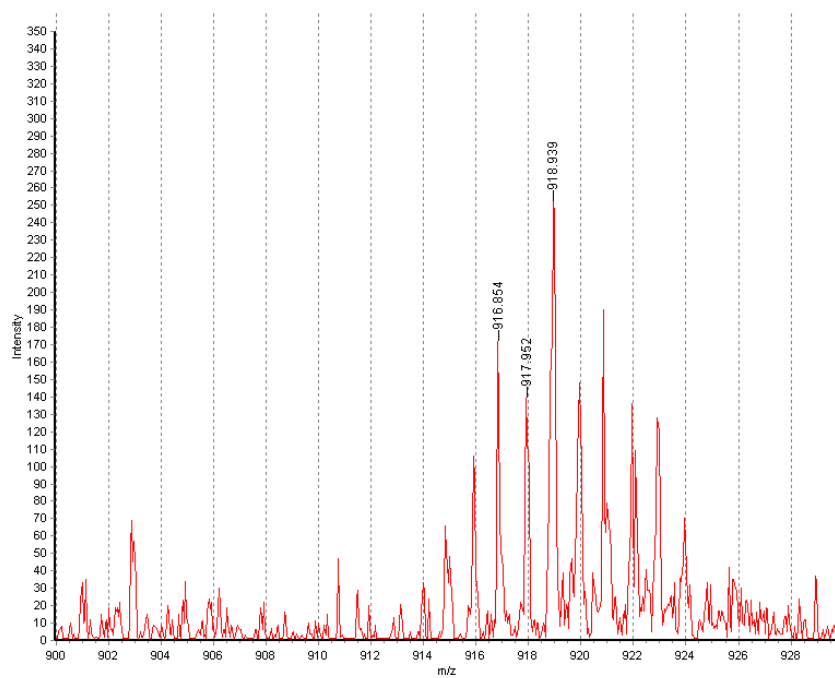

**Figure S9.** MALDI-TOF MS spectrum of **6c**.

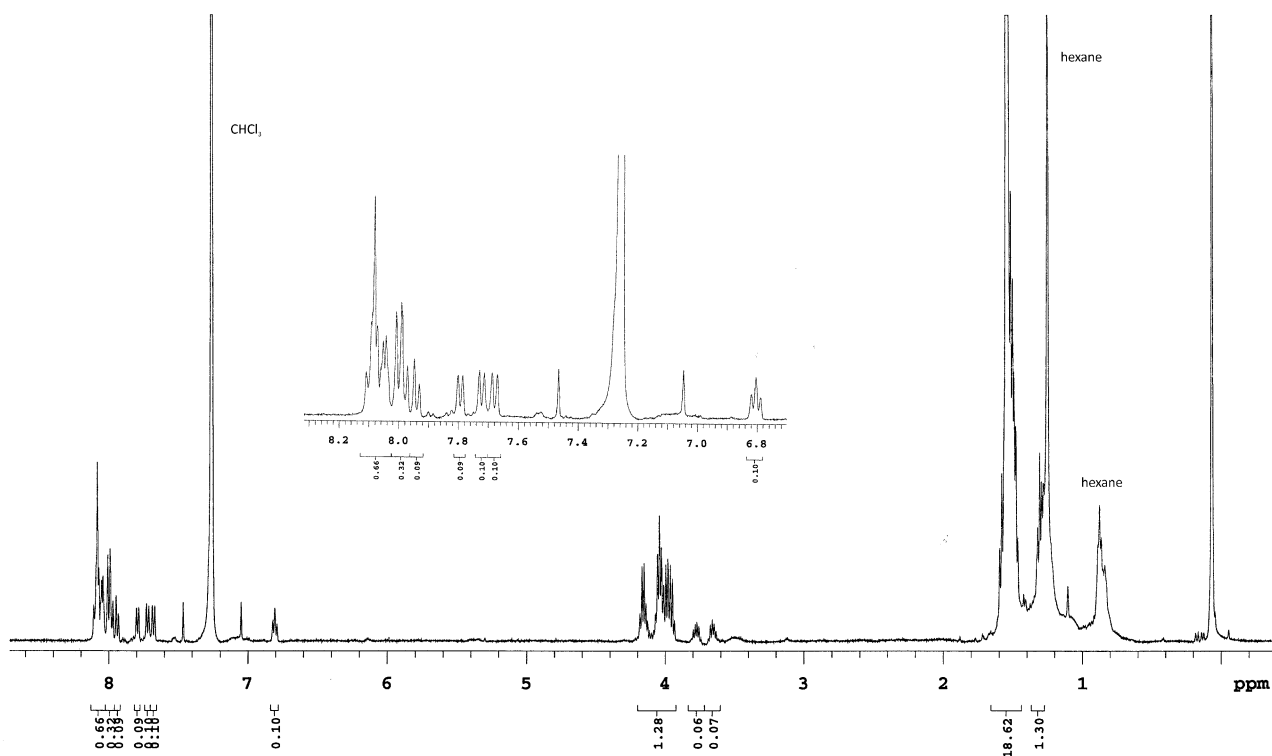

**Figure S10.**  $^1\text{H}$ NMR spectrum of compound **NiPzHelix** in  $\text{CDCl}_3$ .

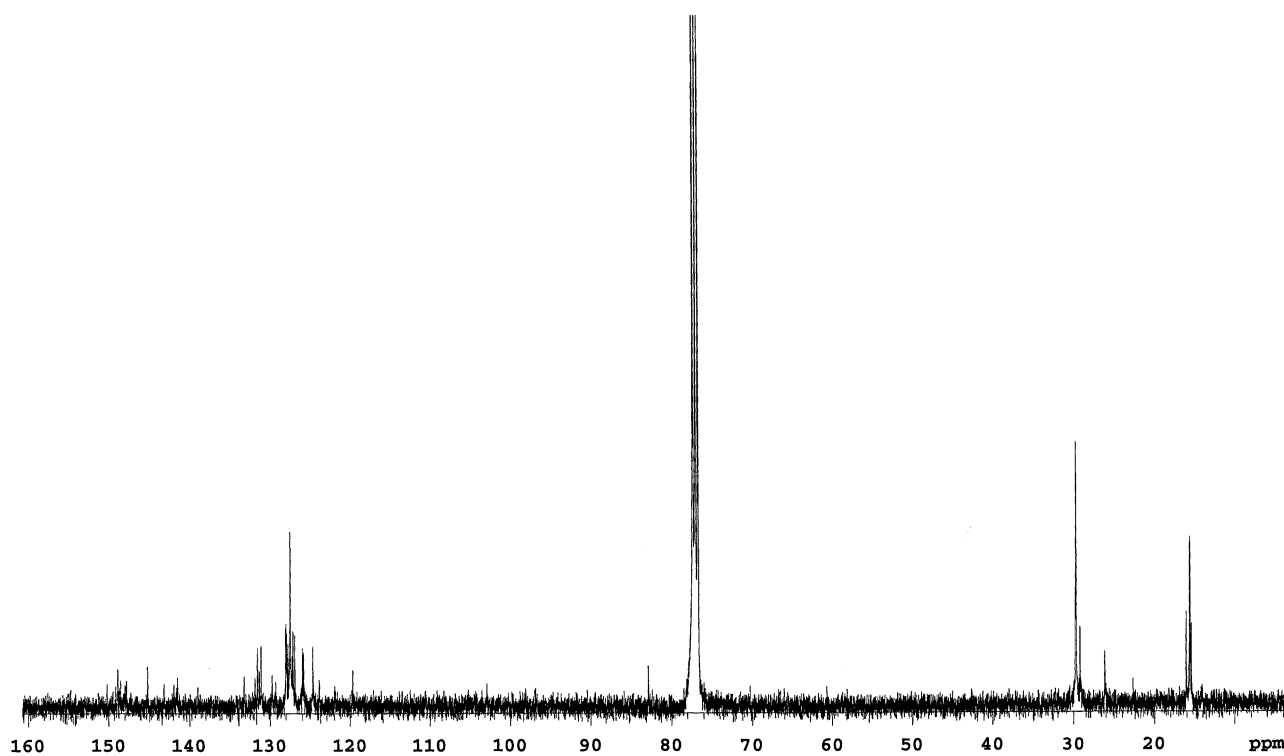

**Figure S11.**  $^{13}\text{C}$ NMR spectrum of compound **NiPzHelix** in  $\text{CDCl}_3$ .



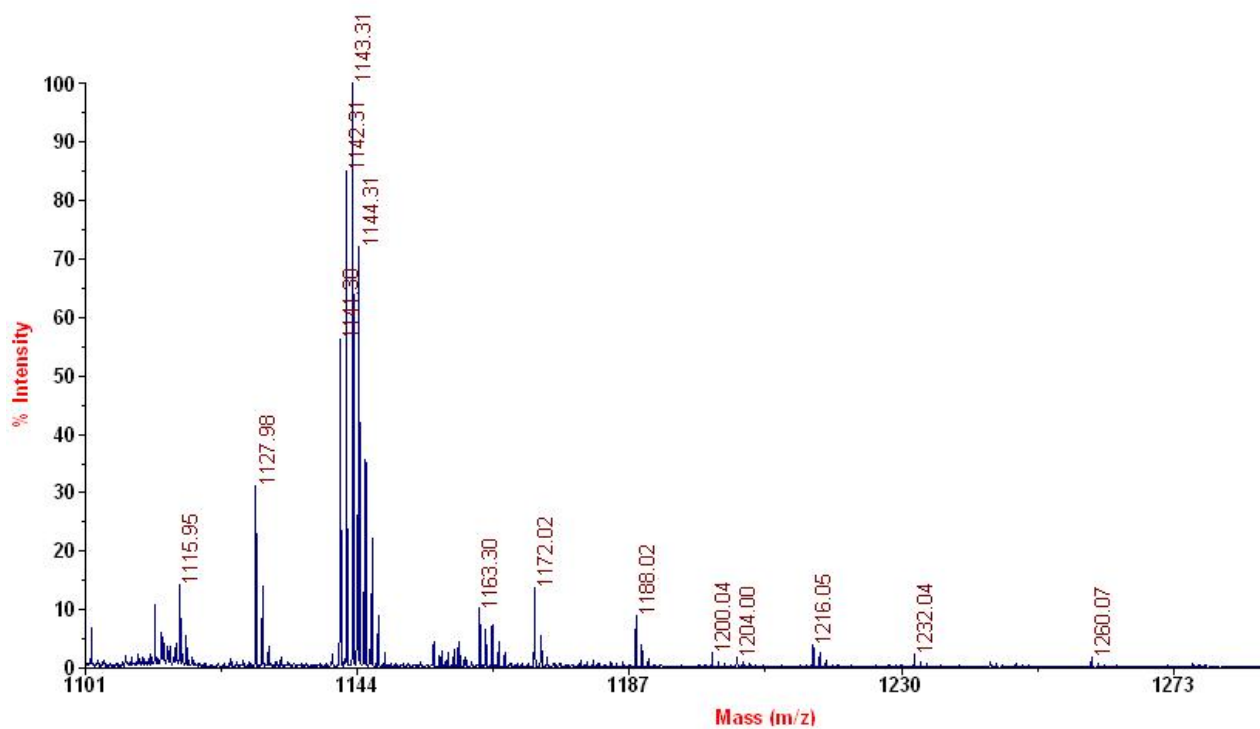

Figure S12. MALDI-TOF MS spectrum of NiPzHelix.

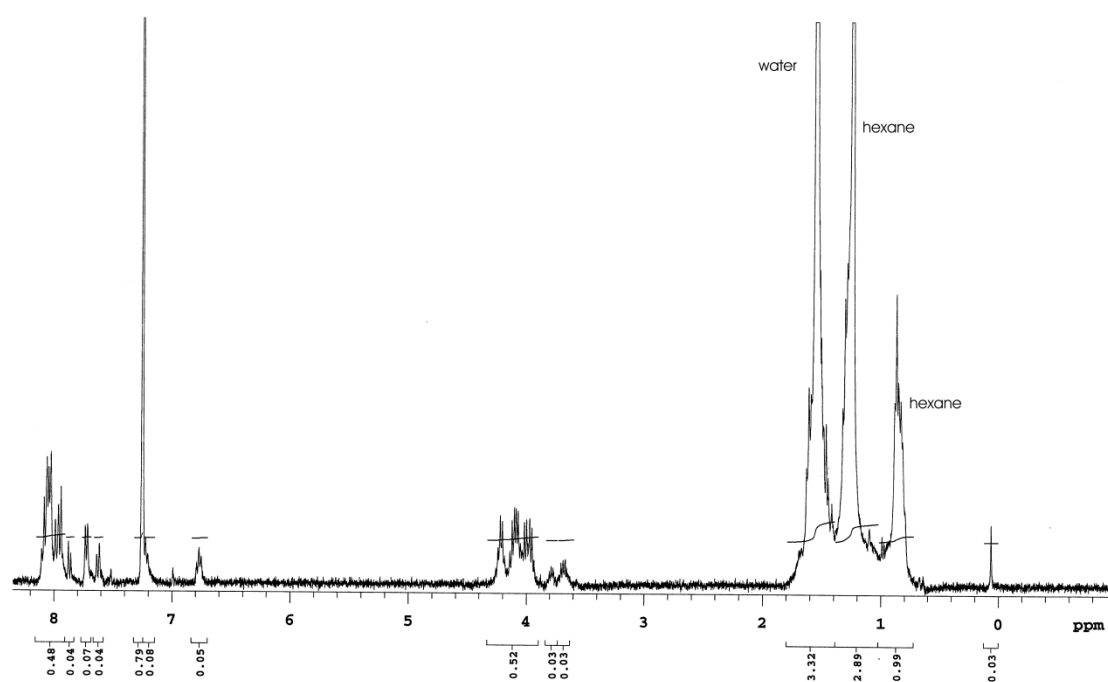

Figure S13. <sup>1</sup>H NMR spectrum of compound PdPzHelix in CDCl<sub>3</sub>.

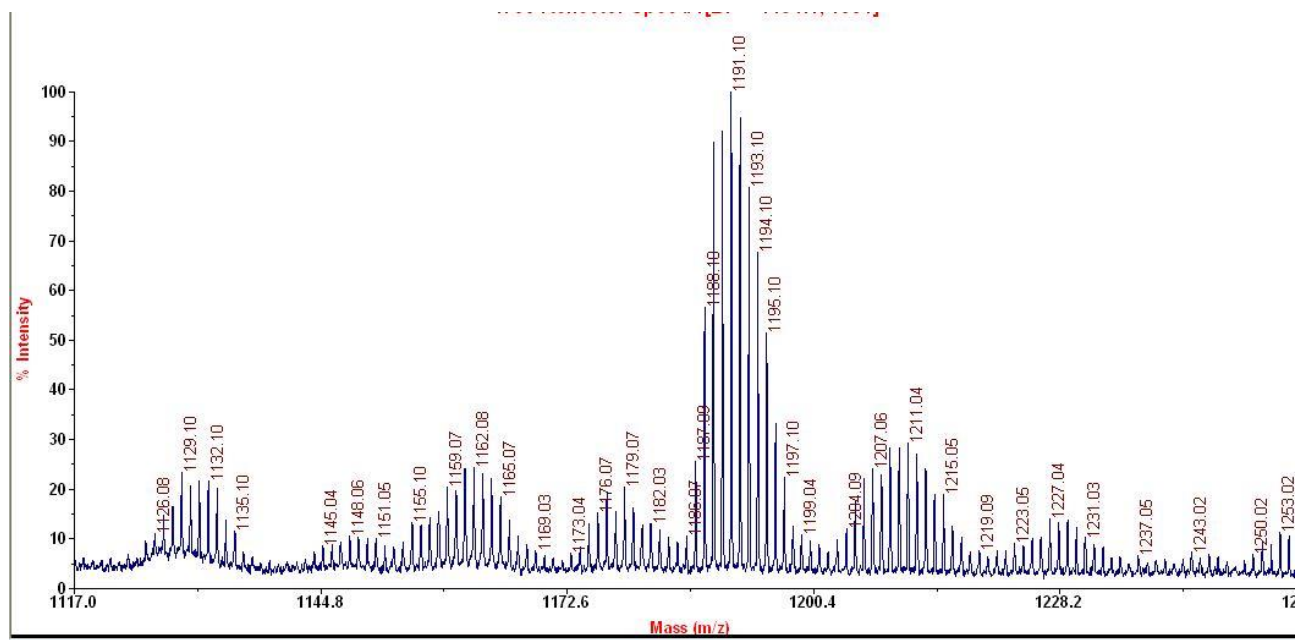

**Figure S14.** MALDI-TOF MS spectrum of **PdPzHelix**.

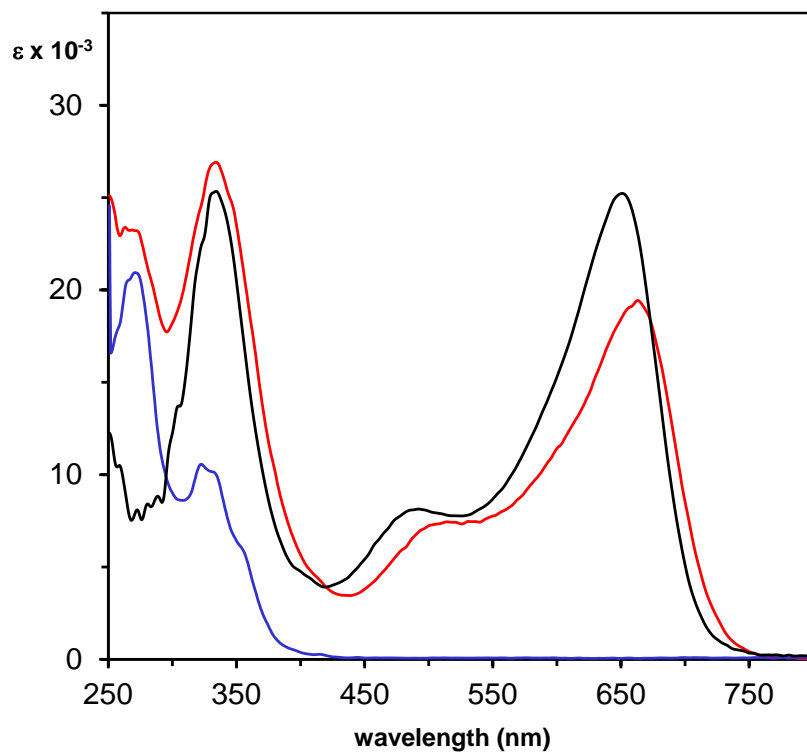

**Figure S15.** UV-vis spectra (CH<sub>2</sub>Cl<sub>2</sub>) of 2-ethynyl hexahelicene (**3**) (blue line), Pd(II) complex **6c** (black line), and **PdPzHelix** (red line).

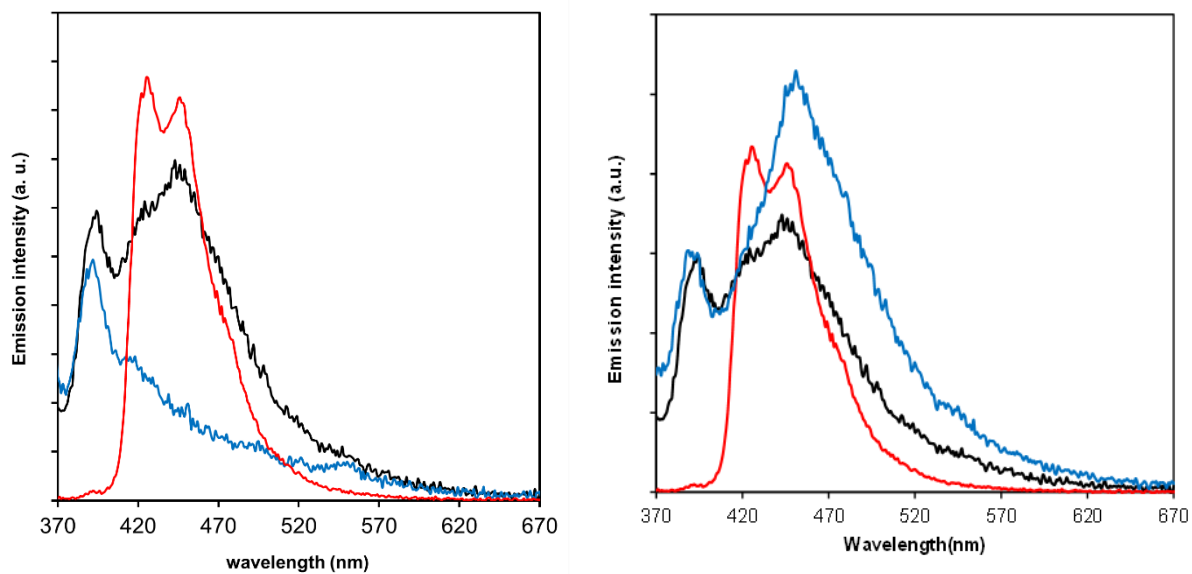

**Figure S16.** (a) Left: Comparison of the emission spectrum ( $\text{CH}_2\text{Cl}_2$ ,  $\lambda_{\text{exc}}$  350 nm) of **NiPzHelix** ( $c = 8.4 \times 10^{-6}$  M black line), of 2-ethynyl hexahelicene (**3**) ( $c = 1.4 \times 10^{-6}$  M, red line) and of Ni(II) complex **Ni-4** ( $c = 1.0 \times 10^{-5}$  M, blue line). (b) Right: comparison of the emission spectrum ( $\text{CH}_2\text{Cl}_2$ ,  $\lambda_{\text{exc}}$  350 nm) of **NiPzHelix** ( $c = 8.4 \times 10^{-6}$  M black line), of **PdPzHelix** ( $c = 9.2 \times 10^{-6}$  M blue line), of 2-ethynyl hexahelicene (**3**) ( $c = 1.4 \times 10^{-6}$  M, red line).

## DFT Calculations.

Calculations have been conducted on a model compound with SCH<sub>3</sub> pendant groups to avoid too many conformers. The helicene P enantiomer has been considered.

Considering the *up* (*u*) and *down* (*d*) orientation of the pendant groups, notation already introduced in references [1] and [2], the thioalkyl chains of **Ni-4** manifest the lowest energy conformation with the up-up-down-down orientation (*uudd*). In **NiPzHelix** case the presence of a bulky substituent influences the conformation of the nearby groups. A conformational search permits to identify the most stable conformers

**Table S1. NiPzHelix:** Geometrical and energy characteristics of the principal optimized conformers. Optimization at bp86/ 6-31+G\* level, LANL2DZ pseudopotential for Ni.

|   | Kcal/mol | pop   | $\tau_1$ | $\tau_2$ | $\tau_3$ | $\tau_4$ | $\tau_5$ | $\tau_6$ | $\tau_7$ | Approx.        |
|---|----------|-------|----------|----------|----------|----------|----------|----------|----------|----------------|
| a | 0.00     | 54.5% | 140      | -134     | -136     | 138      | 128      | -174     | 11       | <i>dduud00</i> |
| b | 0.48     | 24.3% | 144      | -133     | -138     | 135      | 137      | -134     | -140     | <i>dduuddu</i> |
| c | 0.56     | 21.2% | 169      | -126     | -138     | 137      | 127      | -172     | -8       | <i>0duud00</i> |
| d | 1.75     | 2.8%  | 143      | 135      | 129      | -162     | -26      | 128      | 137      | <i>dud00ud</i> |
| e | 2.21     | 1.3%  | 144      | 132      | 137      | 133      | 136      | 133      | 137      | <i>dududud</i> |

Definition of reported dihedral angles:  $\tau_1$  (red),  $\tau_2$  (green) and analogously for all subsequent CCSC torsions.

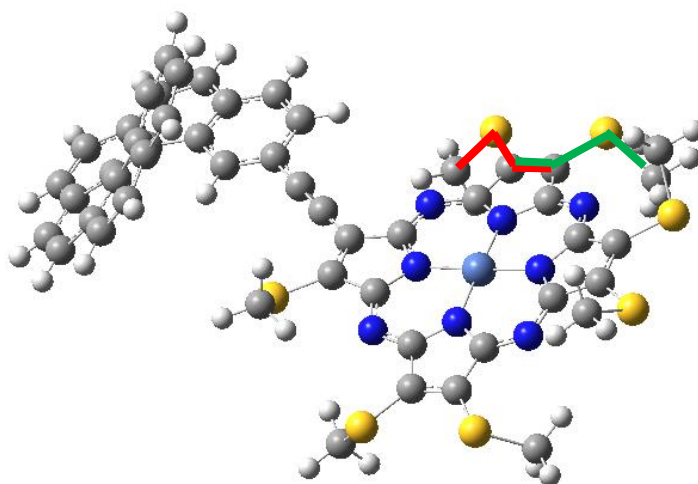

[1] A. Rosa, G. Ricciardi, E. J. Baerends, M. Zimin, M. A. J. Rodgers, S. Matsumoto, N. Ono, *Inorg. Chem.* **2005**, *44*, 6609–6622.

[2] S. Ghidinelli, S. Abbate, E. Santoro, S. Belviso, G. Longhi, *J. Phys. Chem. B* **2021**, *125*, 264–280.

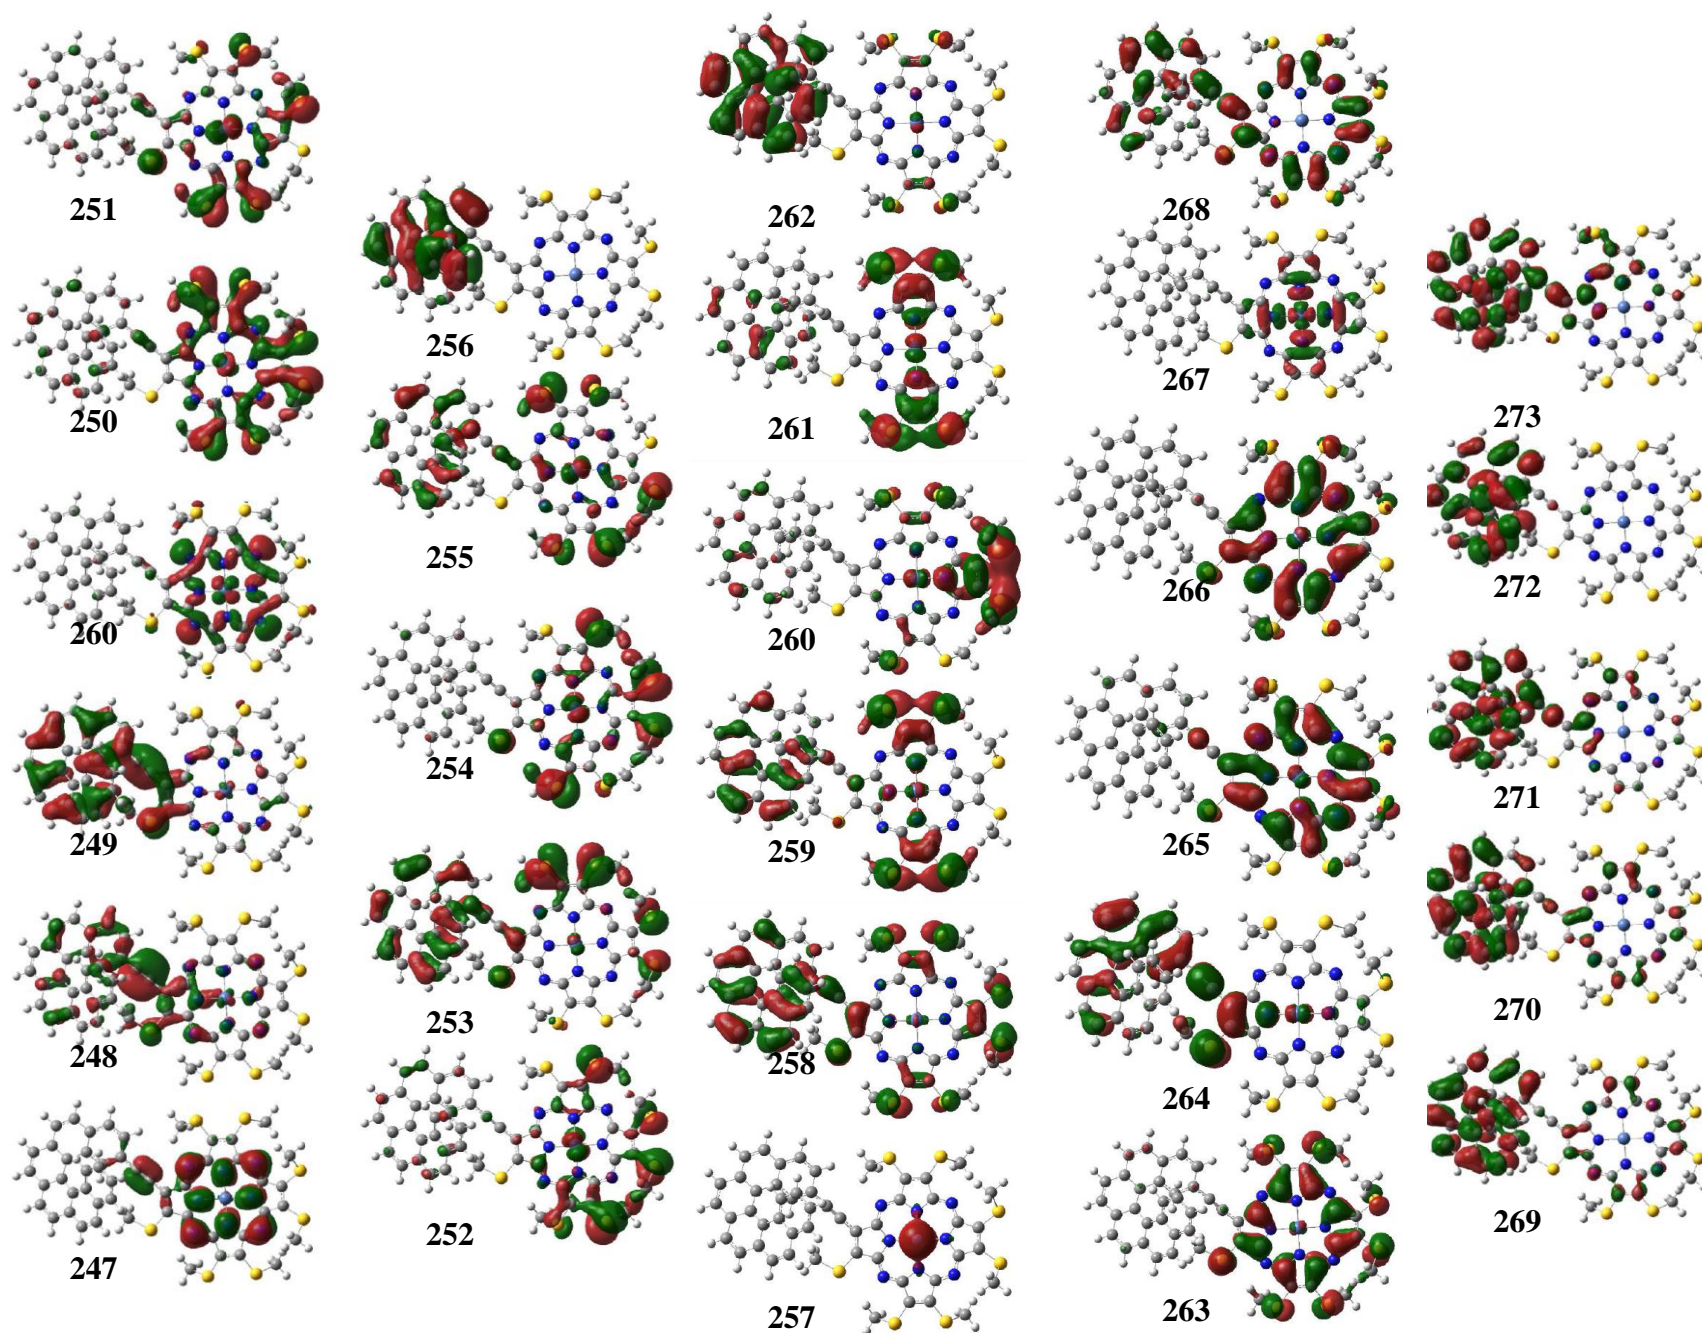

**Figure S17.** Kohn–Sham orbital graphical representations of some more relevant orbitals used to describe the transitions in Table S2 for **NiPzHelix**.



**Table S2. NiPzHelix:** Spectroscopic characteristics of the main calculated transitions: wavelength  $\lambda$  (nm), oscillator strength  $f$ , rotational strength  $R$  ( $\text{esu}^2\text{cm}^2$ ), KS energy levels. Color code refer to the type of orbital: red, Gouterman orbital; yellow, orbital localized on Pz; green, orbital with major contribution from nickel; blue, orbital mainly localized on helicene; light blue, orbital localized on helicene and triple bond bridge; purple, orbital on the bridge; black, delocalized orbital.

| #   | $\lambda$ | $f$   | $R$    |            |            |       |            |            |       |              |            |       |  |  |  |  |  |  |
|-----|-----------|-------|--------|------------|------------|-------|------------|------------|-------|--------------|------------|-------|--|--|--|--|--|--|
| 1   | 912       | 0.024 | -1.8   | 264 heli-b | 265 Gout.  | -0.48 | 264 heli-b | 266 Gout.  | 0.51  |              |            |       |  |  |  |  |  |  |
| 2   | 875       | 0.091 | -9.2   | 264 heli-b | 265 Gout.  | 0.51  | 264 heli-b | 266 Gout.  | 0.48  |              |            |       |  |  |  |  |  |  |
| 7   | 741       | 0.008 | 13.4   | 261 Pz     | 266 Gout.  | 0.59  | 261 Pz     | 265 Gout.  | -0.21 | 262 helicene | 266 Gout.  | -0.20 |  |  |  |  |  |  |
| 9   | 722       | 0.059 | 16.0   | 260 Pz     | 266 Gout.  | 0.50  | 263 Gout.  | 265 Gout.  | -0.27 | 263 Gout.    | 266 Gout.  | -0.24 |  |  |  |  |  |  |
| 10  | 714       | 0.052 | -30.2  | 259 deloc. | 265 Gout.  | 0.39  | 263 Gout.  | 265 Gout.  | 0.35  | 260 Pz       | 265 Gout.  | 0.31  |  |  |  |  |  |  |
| 11  | 693       | 0.078 | 26.5   | 259 deloc. | 266 Gout.  | 0.45  | 263 Gout.  | 266 Gout.  | 0.36  | 258 deloc.   | 266 Gout.  | -0.22 |  |  |  |  |  |  |
| 17  | 649       | 0.052 | -70.6  | 257 Ni     | 265 Gout.  | 0.51  | 258 deloc. | 266 Gout.  | -0.30 | 257 Ni       | 266 Gout.  | -0.23 |  |  |  |  |  |  |
| 18  | 644       | 0.163 | 126.8  | 257 Ni     | 266 Gout.  | 0.45  | 259 deloc. | 266 Gout.  | 0.29  | 258 deloc.   | 265 Gout.  | -0.27 |  |  |  |  |  |  |
| 19  | 637       | 0.085 | -65.1  | 257 Ni     | 266 Gout.  | 0.41  | 258 deloc. | 266 Gout.  | -0.35 | 260 Pz       | 267 Ni     | 0.28  |  |  |  |  |  |  |
| 20  | 624       | 0.215 | 20.8   | 261 Pz     | 267 Ni     | 0.48  | 258 deloc. | 266 Gout.  | -0.25 | 263 Gout.    | 266 Gout.  | -0.21 |  |  |  |  |  |  |
| 21  | 615       | 0.121 | -33.9  | 260 Pz     | 267 Ni     | 0.61  | 257 Ni     | 266 Gout.  | -0.20 |              |            |       |  |  |  |  |  |  |
| 34  | 490       | 0.145 | 63.1   | 264 heli-b | 268 deloc. | 0.53  | 252 Pz     | 266 Gout.  | -0.32 | 251 Pz       | 265 Gout.  | 0.19  |  |  |  |  |  |  |
| 35  | 489       | 0.105 | 174.0  | 252 Pz     | 266 Gout.  | 0.44  | 264 heli-b | 268 deloc. | 0.36  | 252 Pz       | 265 Gout.  | -0.34 |  |  |  |  |  |  |
| 71  | 391       | 0.029 | 172.0  | 260 Pz     | 270 heli   | 0.48  | 262 heli   | 269 heli   | -0.22 | 258 deloc.   | 269 heli   | 0.22  |  |  |  |  |  |  |
| 72  | 381       | 0.042 | 221.9  | 256 heli   | 268 deloc. | 0.47  | 264 heli-b | 271 heli   | 0.30  | 258 deloc.   | 269 heli   | 0.27  |  |  |  |  |  |  |
| 76  | 373       | 0.062 | 163.9  | 256 heli   | 268 deloc. | 0.39  | 258 deloc. | 270 heli   | 0.32  | 264 heli-b   | 271 heli   | -0.27 |  |  |  |  |  |  |
| 77  | 371       | 0.108 | -110.6 | 255 deloc. | 268 deloc. | 0.49  | 245 ->     | 265 Gout.  | -0.24 | 264 heli-b   | 271 heli   | -0.23 |  |  |  |  |  |  |
| 81  | 364       | 0.138 | -16.6  | 254 Pz     | 268 deloc. | 0.64  | 246 Gout.  | 265 Gout.  | -0.14 |              |            |       |  |  |  |  |  |  |
| 90  | 354       | 0.455 | -47.6  | 246 Gout.  | 265 Gout.  | 0.25  | 247 bridge | 267 Ni     | -0.23 | 264 heli-b   | 272 heli   | 0.21  |  |  |  |  |  |  |
|     |           |       |        | 246 Gout.  | 267 Ni     | -0.21 | 261 Pz     | 271 heli   | 0.21  | 253 deloc.   | 268 deloc. | -0.19 |  |  |  |  |  |  |
| 93  | 351       | 0.112 | -6.4   | 246 Gout.  | 267 Ni     | 0.47  | 261 Pz     | 271 heli   | -0.33 | 260 Pz       | 271 heli   | 0.11  |  |  |  |  |  |  |
| 94  | 350       | 0.152 | 5.4    | 256 heli   | 269 heli   | 0.34  | 246 Gout.  | 266 Gout.  | -0.26 | 246 Gout.    | 265 Gout.  | -0.23 |  |  |  |  |  |  |
| 95  | 349       | 0.136 | -99.7  | 256 heli   | 269 heli   | 0.41  | 255 deloc. | 269 heli   | -0.26 | 242 ->       | 265 Gout.  | 0.22  |  |  |  |  |  |  |
| 101 | 343       | 0.112 | -53.5  | 260 Pz     | 271 heli   | 0.43  | 242 ->     | 266 Gout.  | -0.33 | 254 Pz       | 269 heli   | 0.19  |  |  |  |  |  |  |
| 145 | 303       | 0.146 | -121.8 | 264 heli-b | 273 heli   | 0.25  | 249 Pz     | 269 heli   | 0.24  | 258 deloc.   | 272 heli   | 0.23  |  |  |  |  |  |  |

Absorption and ECD spectrum of **NiPzHelix** has been calculated at the M06-L/6-31+G\* level, LANL2DZ pseudopotential for Ni on the previously optimized geometry considering solvent with iefpcm model.

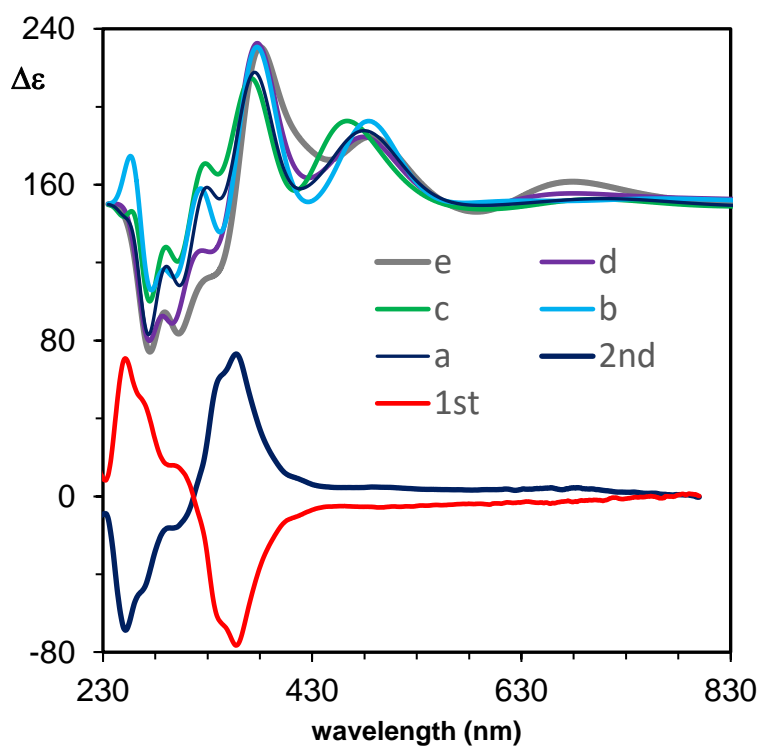

**Figure S18.** Calculated ECD spectra for the five principal conformers of **NiPzHelix**.

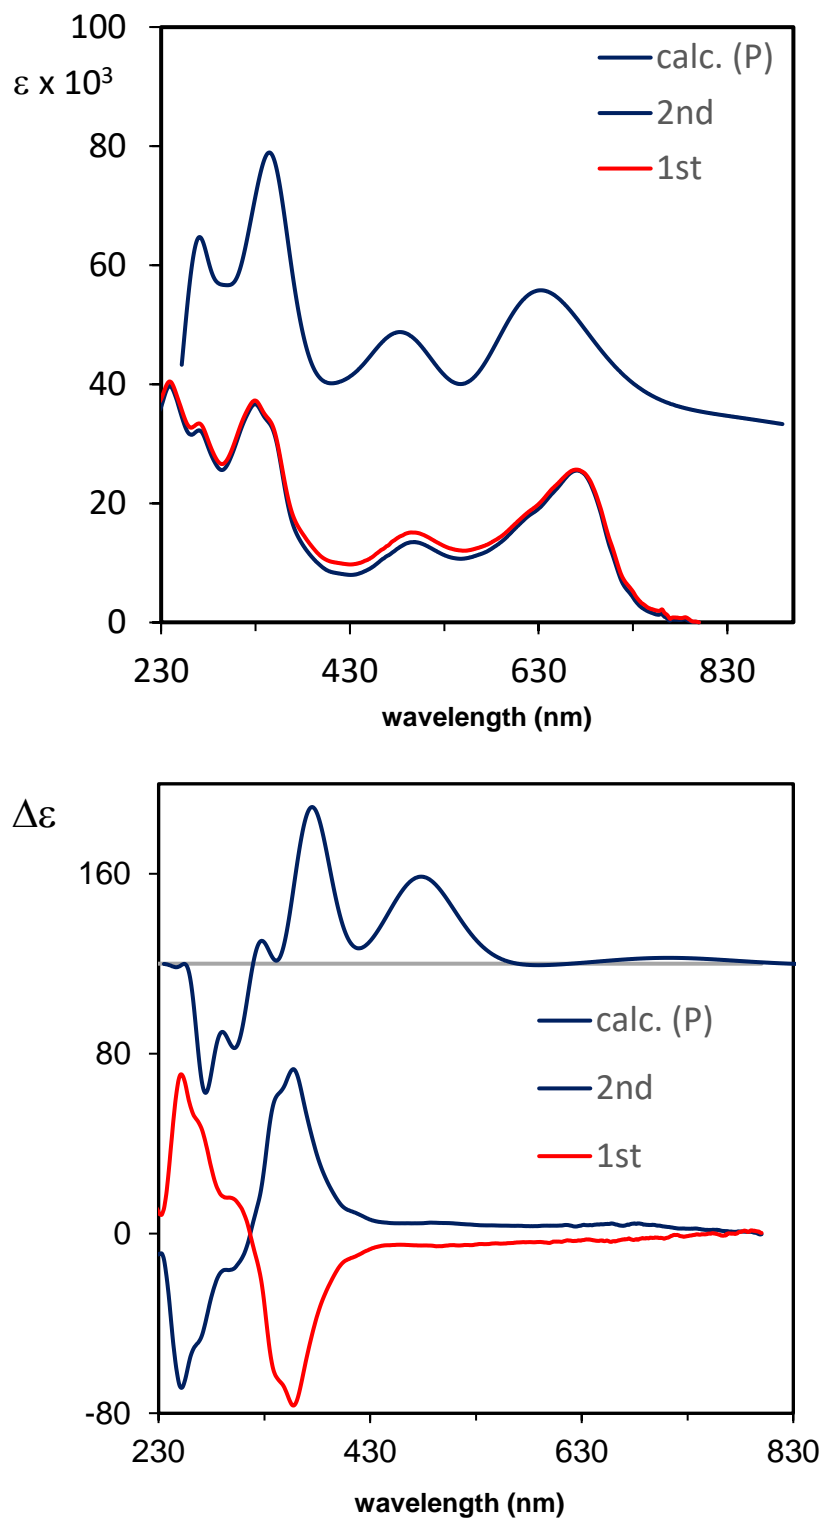

**Figure S19.** Calculated absorption and ECD spectra of **NiPzHelix**, after average over the five principal conformers in comparison with the experimental spectra obtained on the two eluted fractions. (bp86/6-31+G\*\*/m06l//6-31+G\*; iefpcm CH<sub>2</sub>Cl<sub>2</sub>).



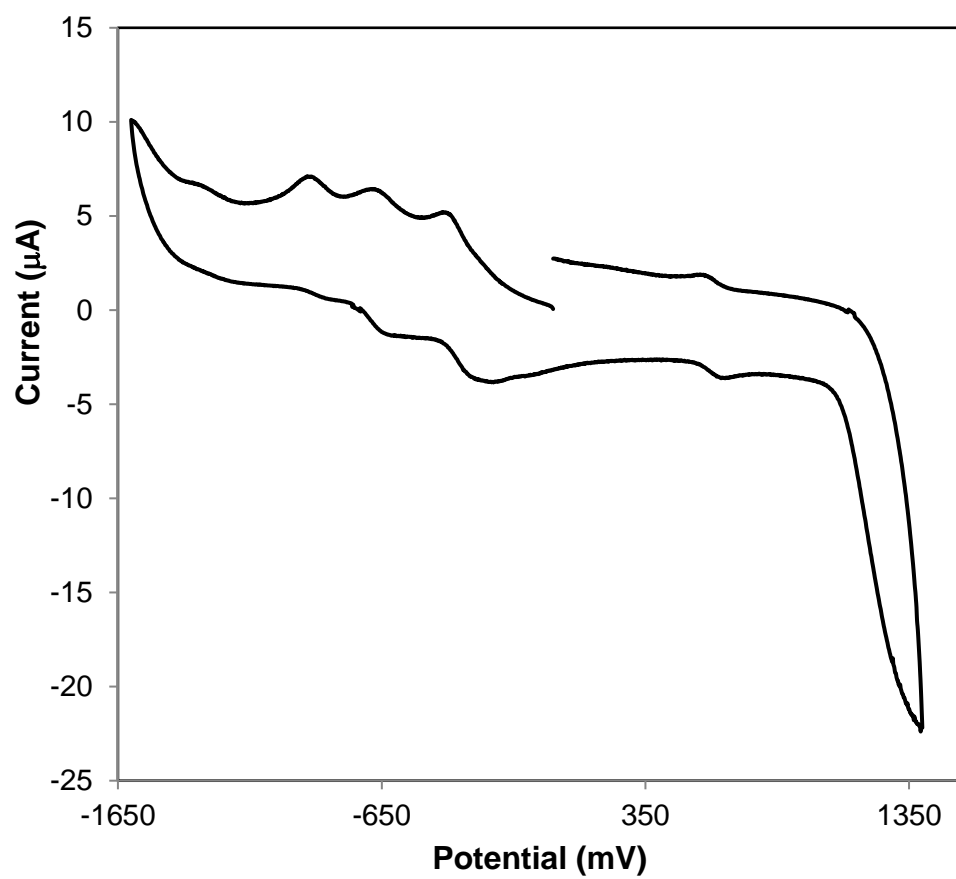

**Figure S20.** Cyclic voltammogram of **PdPzHelix** complex in CH<sub>2</sub>Cl<sub>2</sub>.
